# Supplementary material for: Molecular heterogeneity assessment by next-generation sequencing and response to gefitinib of EGFR mutant advanced lung adenocarcinoma
Source: PubMed Central journal article supplement (PMC4494974; doi:10.18632/oncotarget.3727), 2015-03-30
Supplement: oncotarget-06-12783-s001.pdf [file oncotarget-06-12783-s001.pdf]

## Molecular heterogeneity assessment by next-generation sequencing and response to gefitinib of *EGFR* mutant advanced lung adenocarcinoma

### Supplementary Material

**Supplementary Table 1.** Patients' characteristics according to NGS analysis: type of mutation and PMA.

| Patient | Group        | Type of Mutation (PMA)    |             |             |               |               |             |              |
|---------|--------------|---------------------------|-------------|-------------|---------------|---------------|-------------|--------------|
|         |              | <i>EGFR</i>               | <i>TP53</i> | <i>KRAS</i> | <i>CTNNB1</i> | <i>PIK3CA</i> | <i>MET</i>  | <i>SMAD4</i> |
| 1       | Good         | L858R (32%)               |             |             |               |               |             |              |
| 2       | Good         | p.E746_A750del (31%)      |             |             |               |               |             |              |
| 3       | Good         | L858R (56%)               |             |             |               |               |             |              |
| 4       | Good         | L858R (86%)               |             |             |               |               |             |              |
| 5       | Good         | p.E746_A750del (71%)      |             |             |               |               |             |              |
| 6       | Good         | p.E746_A750del (88%)      |             |             |               |               |             |              |
| 7       | Good         | p.L747_T751del (64%)      |             |             | S33C (20%)    |               |             | G358E (44%)  |
| 8       | Good         | p.E746_S752delinsA (28%)  |             |             | S45P (5%)     |               |             |              |
| 9       | Intermediate | p.L747QfsTer16 (23%)      | R273G (45%) |             |               |               |             |              |
| 10      | Intermediate | p.E746_A750del (94%)      | R248W (48%) |             |               |               |             |              |
| 11      | Intermediate | p.E745_A750del (30%)      | R175H (27%) |             |               |               |             |              |
| 12      | Poor         | L858R (36%)               | R273L (47%) |             |               |               |             |              |
| 13      | Poor         | p.E746_T751delinsIA (11%) |             | G12C (5%)   |               |               |             |              |
| 14      | Poor         | p.E746_A750del (20%)      |             |             |               |               |             |              |
| 15      | Poor         | L858R (43%)               |             | G12C (22%)  |               | E542K (31%)   |             |              |
| 16      | Poor         | p.E746_A750del (31%)      | R248L (40%) |             |               |               |             |              |
| 17      | Poor         | E746_A750del (94%)        | R175L (37%) |             |               |               | N375S (34%) |              |

**Legend – Supplementary Table 1.** NGS: next generation sequencing; PMA: Proportion of Mutated Alleles,
